# Supplementary material for: Development and Validation of a Nomogram for Predicting Overall and Cancer-Specific Survival in Elderly NSCLC Patients with Brain Metastases
Source: Research Square preprint supplement (doi:10.21203/rs.3.rs-8257867/v1), 2025-12-08
Supplement: Supplementary file 1 [file 06804785e60fe1b0510b1a40.docx]

| **Variables** | **No BrM** | **BrM** | ***P value*** |
| --- | --- | --- | --- |
| Number of patients | 99198 | 9514 |  |
| ***Gender*** |  |  |  |
| Male | 52411 | 5056 | 0.619 |
| Female | 46787 | 4458 |  |
| ***Age*** |  |  |  |
| <67 | 24372 | 3436 | <0.001 |
| 67-73 | 32266 | 3147 |  |
| >73 | 42560 | 2931 |  |
| ***Race*** |  |  |  |
| White | 82558 | 7597 | <0.001 |
| Black | 9589 | 968 |  |
| Others | 7051 | 949 |  |
| ***Marital status*** |  |  |  |
| Married | 54776 | 5368 | <0.001 |
| Unmarried | 44422 | 4146 |  |
| ***T stage*** |  |  |  |
| T1 | 32663 | 1407 | <0.001 |
| T2 | 31423 | 2920 |  |
| T3 | 18641 | 2433 |  |
| T4 | 16471 | 2754 |  |
| ***N stage*** |  |  |  |
| N0 | 54594 | 2397 | <0.001 |
| N1 | 8923 | 931 |  |
| N2 | 27028 | 4439 |  |
| N3 | 8653 | 1747 |  |
| ***Tumor size*** |  |  |  |
| <36 | 55549 | 3375 | <0.001 |
| 36-56 | 23384 | 3063 |  |
| >56 | 20265 | 3076 |  |
| ***Radiation*** |  |  |  |
| Yes | 37983 | 7506 | <0.001 |
| No/unknown | 61215 | 2008 |  |
| ***Chemotherapy*** |  |  |  |
| Yes | 39882 | 5265 | <0.001 |
| No/unknown | 59316 | 4249 |  |
| ***Surgery*** |  |  |  |
| Yes | 9164 | 1906 | <0.001 |
| No/unknown | 90034 | 7608 |  |
| ***Bone metastasis*** |  |  |  |
| Yes | 11019 | 3123 | <0.001 |
| No/unknown | 88179 | 6391 |  |
| ***Liver metastasis*** |  |  |  |
| Yes | 4365 | 1430 | <0.001 |
| No/unknown | 94833 | 8084 |  |
| ***Lung metastasis*** |  |  |  |
| Yes | 9487 | 2285 | <0.001 |
| No/unknown | 89711 | 7229 |  |
| ***Primary lesion site*** |  |  |  |
| Main bronchus | 2486 | 364 | <0.001 |
| Upper lobe | 57532 | 5533 |  |
| Middle lobe | 4447 | 404 |  |
| Lower lobe | 30530 | 2676 |  |
| Overlapping lesion of lung | 877 | 77 |  |
| Lung, NOS | 3326 | 460 |  |
| ***Laterality*** |  |  |  |
| Left | 41476 | 3990 | 0.989 |
| Right | 57722 | 5524 |  |
| ***Grade*** |  |  |  |
| Grade I | 35840 | / | <0.001 |
| Grade II | 12394 | / |  |
| Grade III | 22719 | / |  |
| Grade IV | 28245 | 9514 |  |
