# Supplementary material for: Development and Validation of a Nomogram for Predicting Overall and Cancer-Specific Survival in Elderly NSCLC Patients with Brain Metastases
Source: Research Square preprint supplement (doi:10.21203/rs.3.rs-8257867/v1), 2025-12-08
Supplement: Supplementary file 2 [file 08b92c7f644b756cdccb00b6.docx]

| **Variables** | **Univariate** | | **Multivariate** | |
| --- | --- | --- | --- | --- |
|  | **HR (95% CI)** | ***P* value** | **HR (95% CI)** | ***P* value** |
| ***Age*** |  |  |  |  |
| <67 | Reference |  | Reference |  |
| 67-73 | 1.227（1.164,1.293） | <0.01 | 1.169（1.109,1.232） | <0.01 |
| >73 | 1.514（1.436,1.596） | <0.01 | 1.314（1.245,1.387） | <0.01 |
| ***Gender*** |  |  |  |  |
| Female | Reference |  | Reference |  |
| Male | 1.233（1.181,1.287） | <0.01 | 1.236（1.182,1.293） | <0.01 |
| ***Race*** |  |  |  |  |
| Black | Reference |  | Reference |  |
| White | 1.028（0.957,1.104） | 0.522 | 1.117（1.038,1.200） | 0.011 |
| Others | 0.702（0.636,0.776） | <0.01 | 0.724（0.654,0.801） | <0.01 |
| ***Marital status*** |  |  |  |  |
| Married | Reference |  | Reference |  |
| Unmarried | 1.195（1.144,1.248） | <0.01 | 1.110（1.061,1.161） | <0.01 |
| ***Laterality*** |  |  |  |  |
| Left | Reference |  |  |  |
| Right | 1.014（0.970,1.059） | 0.595 |  |  |
| ***Liver metastasis*** |  |  |  |  |
| No/unknown | Reference |  | Reference |  |
| Yes | 1.566（1.476,1.661） | <0.01 | 1.503（1.412,1.600） | <0.01 |
| ***Bone metastasis*** |  |  |  |  |
| No/unknown | Reference |  | Reference |  |
| Yes | 1.177（1.125,1.232） | <0.01 | 1.169（1.113,1.228） | <0.01 |
| ***Lung metastasis*** |  |  |  |  |
| No/unknown | Reference |  | Reference |  |
| Yes | 1.162（1.105,1.221） | <0.01 | 1.075（1.021,1.132） | 0.020 |
| ***T stage*** |  |  |  |  |
| T1 | Reference |  |  |  |
| T2 | 1.162（1.083,1.246） | <0.01 |  |  |
| T3 | 1.353（1.260,1.454） | 0.388 |  |  |
| T4 | 1.373（1.280,1.473） | <0.01 |  |  |
| ***N stage*** |  |  |  |  |
| N0 | Reference |  | Reference |  |
| N1 | 1.120（1.033,1.216） | 0.0211 | 1.213（1.118,1.317） | <0.01 |
| N2 | 1.211（1.148,1.277） | <0.01 | 1.334（1.263,1.409） | <0.01 |
| N3 | 1.218（1.140,1.302） | <0.01 | 1.457（1.360,1.561） | <0.01 |
| ***Primary Site*** |  |  |  |  |
| Lower lobe, lung | Reference |  |  |  |
| Lung, NOS | 1.115（1.005,1.236） | 0.082 |  |  |
| Main bronchus | 1.126（1.004,1.263） | 0.087 |  |  |
| Middle lobe, lung | 0.932（0.832,1.043） | 0.305 |  |  |
| Overlapping lesion of lung | 1.239（0.995,1.544） | 0.107 |  |  |
| Upper lobe, lung | 0.939（0.893,0.986） | 0.036 |  |  |
| ***Chemotherapy*** |  |  |  |  |
| No/unknown | Reference |  | Reference |  |
| Yes | 0.690（0.655,0.727） | <0.01 | 0.345（0.329,0.362） | <0.01 |
| ***Radiation*** |  |  |  |  |
| No/unknown | Reference |  | Reference |  |
| Yes | 0.690（0.655,0.727） |  | 0.999（0.945,1.055） | 0.986 |
| ***Surgery*** |  |  |  |  |
| No/unknown | Reference |  | Reference |  |
| Yes | 0.605（0.572,0.640） | <0.01 | 0.686（0.647,0.728） | <0.01 |
| ***Tumor size*** |  |  |  |  |
| <36 | Reference |  | Reference |  |
| 36-56 | 1.124（1.067,1.185） | <0.01 | 1.135（1.076,1.198） | <0.01 |
| >56 | 1.390（1.319,1.465） | <0.01 | 1.315（1.247,1.387） | <0.01 |
