# Supplementary material for: Development and Validation of a Nomogram for Predicting Overall and Cancer-Specific Survival in Elderly NSCLC Patients with Brain Metastases
Source: Research Square preprint supplement (doi:10.21203/rs.3.rs-8257867/v1), 2025-12-08
Supplement: Supplementary file 3 [file 232865f5b9e2f5d189ec6dbf.docx]

| Index |  | Training cohort |  |  | Validation cohort |  |
| --- | --- | --- | --- | --- | --- | --- |
|  | Estimate | 95%CI | P value | Estimate | 95%CI | P value |
| ***NRI (vs.TNM stage system)*** |  |  |  |  |  |  |
| For 6-month Suvival Rate | 0.872 | 0.829-0.915 |  | 0.883 | 0.818-0.947 |  |
| For 12-month Suvival Rate | 0.809 | 0.761-0.858 |  | 0.779 | 0.705-0.853 |  |
| For 24-month Suvival Rate | 0.802 | 0.738-0.865 |  | 0.784 | 0.686-0.882 |  |
| ***IDI (vs.TNM stage system)*** |  |  |  |  |  |  |
| For 6-month Suvival Rate | 0.241 | 0.231- 0.252 | <0.001 | 0.245 | 0.229-0.261 | <0.001 |
| For 12month Suvival Rate | 0.183 | 0.173- 0.193 | <0.001 | 0.185 | 0.170-0.200 | <0.001 |
| For 24-month Suvival Rate | 0.122 | 0.112-0.133 | <0.001 | 0.121 | 0.106-0.137 | <0.001 |
