# Supplementary material for: Development and Validation of a Nomogram for Predicting Overall and Cancer-Specific Survival in Elderly NSCLC Patients with Brain Metastases
Source: Research Square preprint supplement (doi:10.21203/rs.3.rs-8257867/v1), 2025-12-08
Supplement: Supplementary file 4 [file 701f875ac99da5f776ee2b41.docx]

| **Variables** | **Total** | **Training cohort** | **Validation cohort** | ***P value*** |
| --- | --- | --- | --- | --- |
| ***Number of patients*** | 9514 | 6621 | 2893 |  |
| ***Gender*** |  |  |  |  |
| Male | 5056 | 3077 | 1381 | 0.264 |
| Female | 4458 | 4458 |  |  |
| ***Age*** |  |  |  |  |
| <67 | 3436 | 2421 | 1015 | 0.661 |
| 67-73 | 3147 | 2164 | 983 |  |
| >73 | 2931 | 2036 | 895 |  |
| ***Race*** |  |  |  |  |
| White | 7597 | 5304 | 2293 | 0.729 |
| Black | 968 | 673 | 295 |  |
| Others | 949 | 644 | 305 |  |
| ***Marital status*** |  |  |  |  |
| Married | 5368 | 3704 | 1664 | 0.412 |
| Unmarried | 4146 | 2917 | 1229 |  |
| ***T stage*** |  |  |  |  |
| T1 | 1407 | 960 | 447 | 0.922 |
| T2 | 2920 | 2020 | 900 |  |
| T3 | 2433 | 1704 | 729 |  |
| T4 | 2754 | 1937 | 817 |  |
| ***N stage*** |  |  |  |  |
| N0 | 2397 | 1686 | 711 | 0.930 |
| N1 | 931 | 640 | 291 |  |
| N2 | 4439 | 3096 | 1343 |  |
| N3 | 1747 | 1199 | 548 |  |
| ***Tumor size*** |  |  |  |  |
| <36 | 3375 | 2352 | 1023 | 0.798 |
| 36-56 | 3063 | 2146 | 917 |  |
| >56 | 3076 | 2123 | 953 |  |
| ***Radiation*** |  |  |  |  |
| Yes | 7506 | 5230 | 2276 | 0.666 |
| No/unknown | 2008 | 1391 | 617 |  |
| ***Chemotherapy*** |  |  |  |  |
| Yes | 5265 | 3646 | 1619 | 0.414 |
| No/unknown | 4249 | 2975 | 1274 |  |
| ***Surgery*** |  |  |  |  |
| Yes | 1906 | 1355 | 551 | 0.546 |
| No/unknown | 7608 | 5266 | 2342 |  |
| ***Bone metastasis*** |  |  |  |  |
| Yes | 3123 | 2151 | 972 | 0.626 |
| No/unknown | 6391 | 4470 | 1921 |  |
| ***Liver metastasis*** |  |  |  |  |
| Yes | 1430 | 984 | 446 | 0.629 |
| No/unknown | 8084 | 5637 | 2447 |  |
| ***Lung metastasis*** |  |  |  |  |
| Yes | 2285 | 1562 | 723 | 0.324 |
| No/unknown | 7229 | 5059 | 2170 |  |
| ***Primary lesion site*** |  |  |  |  |
| Main bronchus | 364 | 260 | 104 | 0.402 |
| Upper lobe | 5533 | 3830 | 1703 |  |
| Middle lobe | 404 | 280 | 124 |  |
| Lower lobe | 2676 | 1859 | 817 |  |
| Overlapping lesion of lung | 77 | 60 | 17 |  |
| Lung, NOS | 460 | 332 | 128 |  |
| ***Laterality*** |  |  |  |  |
| Left | 3990 | 2779 | 1211 | 0.42 |
| Right | 5524 | 3842 | 1682 |  |
| ***Grade*** |  |  |  |  |
| Grade IV | 9514 | 6621 | 2893 |  |
