# Supplementary material for: Development and Validation of a Nomogram for Predicting Overall and Cancer-Specific Survival in Elderly NSCLC Patients with Brain Metastases
Source: Research Square preprint supplement (doi:10.21203/rs.3.rs-8257867/v1), 2025-12-08
Supplement: Supplementary file 5 [file 9428c0470cf9fdd895f558f8.docx]

| **Variables** | **Univariate** | | **Multivariate** | |
| --- | --- | --- | --- | --- |
|  | **HR (95% CI)** | ***P* value** | **HR (95% CI)** | ***P* value** |
| ***Age*** |  |  |  |  |
| <67 | Reference |  | Reference |  |
| 67-73 | 1.223（1.158,1.291） | <0.01 | 1.160（1.099,1.225） | <0.01 |
| >73 | 1.531（1.450,1.617) | <0.01 | 1.330（1.258,1.406） | <0.01 |
| ***Gender*** |  |  |  |  |
| Female | Reference |  | Reference |  |
| Male | 1.231（1.177,1.287) | <0.01 | 1.222（1.167,1.280） | <0.01 |
| ***Race*** |  |  |  |  |
| Black | Reference |  | Reference |  |
| White | 0.991 (0.921,1.067) | 0.846 | 1.083（1.004,1.167） | 0.080 |
| Others | 0.681 (0.614,0.755) | <0.01 | 0.713（0.642,0.792） | <0.01 |
| ***Marital status*** |  |  |  |  |
| Married | Reference |  | Reference |  |
| Unmarried | 1.207 (1.154,1.262) | <0.01 | 1.120（1.070,1.174） | <0.01 |
| ***Laterality*** |  |  |  |  |
| Left | Reference |  |  |  |
| Right | 1.004（0.960,1.051) | 0.861 |  |  |
| ***Liver metastasis*** |  |  |  |  |
| No/unknown | Reference |  | Reference |  |
| Yes | 1.585（1.492,1.684) | <0.01 | 1.514（1.420,1.614） | <0.01 |
| ***Bone metastasis*** |  |  |  |  |
| No/unknown | Reference |  | Reference |  |
| Yes | 1.172（1.118,1.229) | <0.01 | 1.159（1.102,1.219） | <0.01 |
| ***Lung metastasis*** |  |  |  |  |
| No/unknown | Reference |  | Reference |  |
| Yes | 1.156（1.098,1.217) | <0.01 | 1.065（1.010,1.124） | 0.049 |
| ***T stage*** |  |  |  |  |
| T1 | Reference |  |  |  |
| T2 | 1.173（1.091,1.262) | <0.01 |  |  |
| T3 | 1.363（1.265,1.468) | 0.878 |  |  |
| T4 | 1.368（1.272,1.472) | <0.01 |  |  |
| ***N stage*** |  |  |  |  |
| N0 | Reference |  | Reference |  |
| N1 | 1.116（1.026,1.214) | 0.031 | 1.206（1.108,1.313） | <0.01 |
| N2 | 1.186（1.122,1.254) | <0.01 | 1.312（1.240,1.389） | <0.01 |
| N3 | 1.214（1.133,1.300) | <0.01 | 1.472（1.370,1.580） | <0.01 |
| ***Primary Site*** |  |  |  |  |
| Lower lobe, lung | Reference |  |  |  |
| Lung, NOS | 1.126（1.012,1.254) | 0.067 |  |  |
| Main bronchus | 1.089（0.967,1.227) | 0.234 |  |  |
| Middle lobe, lung | 0.914（0.813,1.028) | 0.211 |  |  |
| Overlapping lesion of lung | 1.226（0.980,1.533) | 0.133 |  |  |
| Upper lobe, lung | 0.934（0.888,0.983) | 0.029 |  |  |
| ***Chemotherapy*** |  |  |  |  |
| No/unknown | Reference |  | Reference |  |
| Yes | 0.362（0.346,0.379) | <0.01 | 0.347（0.331,0.3649） | <0.01 |
| ***Radiation*** |  |  |  |  |
| No/unknown | Reference |  | Reference |  |
| Yes | 0.699（0.662,0.738) | <0.01 | 1.013（0.957,1.073） | 0.696 |
| ***Surgery*** |  |  |  |  |
| No/unknown | Reference |  | Reference |  |
| Yes | 0.606（0.572,0.642) | <0.01 | 0.688（0.647,0.731） | <0.01 |
| ***Tumor size*** |  |  |  |  |
| <36 | Reference |  | Reference |  |
| 36-56 | 1.118（1.059,1.181) | <0.01 | 1.130（1.069,1.194） | <0.01 |
| >56 | 1.398（1.324,1.476） | <0.01 | 1.317（1.246,1.392） | <0.01 |
