# Supplementary material for: Development and Validation of a Nomogram for Predicting Overall and Cancer-Specific Survival in Elderly NSCLC Patients with Brain Metastases
Source: Research Square preprint supplement (doi:10.21203/rs.3.rs-8257867/v1), 2025-12-08
Supplement: Supplementary file 6 [file c39e4745a7a396ba9fb04f61.docx]

| Index |  | Training cohort |  |  | Validation cohort |  |
| --- | --- | --- | --- | --- | --- | --- |
|  | Estimate | 95%CI | P value | Estimate | 95%CI | P value |
| ***NRI (vs.TNM stage system)*** |  |  |  |  |  |  |
| For 6-month Suvival Rate | 0.865 | 0.821-0.910 |  | 0.881 | 0.814-0.947 |  |
| For 12-month Suvival Rate | 0.800 | 0.749-0.850 |  | 0.789 | 0.713-0.865 |  |
| For 24-month Suvival Rate | 0.780 | 0.713-0.847 |  | 0.800 | 0.698-0.901 |  |
| ***IDI (vs.TNM stage system)*** |  |  |  |  |  |  |
| For 6-month Suvival Rate | 0.240 | 0.229-0.250 | <0.001 | 0.246 | 0.230-0.263 | <0.001 |
| For 12month Suvival Rate | 0.180 | 0.170-0.191 | <0.001 | 0.184 | 0.169-0.200 | <0.001 |
| For 24-month Suvival Rate | 0.119 | 0.108-0.129 | <0.001 | 0.118 | 0.102-0.134 | <0.001 |
